# Supplementary material
Source: PubMed Central journal article supplement (PMC5899437)
Supplement: pnas.1714891115.sd01.pdf [file pnas.1714891115.sd01.pdf]

**Dataset S1.** Studies that reported species abundances in natural and converted habitats, used in our analyses.

1. Almeida-Gomes M, Rocha CFD (2015) Habitat Loss Reduces the Diversity of Frog Reproductive Modes in an Atlantic Forest Fragmented Landscape. *Biotropica* 47(1):113-118.
2. Babbitt KJ, Baber MJ, Childers DL, Hocking D (2009) Influence of Agricultural Upland Habitat Type on Larval Anuran Assemblages in Seasonally Inundated Wetlands. *Wetlands* 29(1):294-301.
3. Bennett SH, Gibbons JW, Glanville J (1980) Terrestrial Activity, Abundance and Diversity of Amphibians in Differently Managed Forest Types. *Am. Midl. Nat.* 103(2):412-416.
4. Bernarde PS, Macedo LC (2008) Impacto do desmatamento e formação de pastagens sobre a anurofauna de serapilheira em Rondônia. *Iheringia* 98(4):454-459.
5. Bury BR (1983) Differences in amphibian populations in logged and old growth redwood forest. *Northwest Sci.* 57:167-178.
6. da Cunha Bitar YO, Juen L, Pinheiro LC, Santos-Costa MCd (2015) Anuran Beta Diversity in a Mosaic Anthropogenic Landscape in Transitional Amazon. *J. Herpetol.* 49(1):75-82.
7. Dixo M, Metzger JP (2010) The matrix-tolerance hypothesis: an empirical test with frogs in the Atlantic Forest. *Biodivers. Conserv.* 19(11):3059-3071.
8. Enge KM, Marion WR (1986) Effects of clearcutting and site preparation on herpetofauna of a north Florida flatwoods. *For. Ecol. Manage.* 14(3):177-192.
9. Faruk A, Belabut D, Ahmad N, Knell RJ, Garner TW (2013) Effects of oil-palm plantations on diversity of tropical anurans. *Conserv. Biol.* 27(3):615-624.
10. Folt B, Reider KE (2013) Leaf-litter herpetofaunal richness, abundance, and community assembly in mono-dominant plantations and primary forest of northeastern Costa Rica. *Biodivers. Conserv.* 22(9):2057-2070.
11. Furlani D, Francesco Ficetola G, Colombo G, Ugurlucan M, De Bernardi F (2009) Deforestation and the structure of frog communities in the Humedale Terraba-Sierpe, Costa Rica. *Zool. Sci.* 26(3):197-202.
12. Gardner TA, Fitzherbert EB, Drewes RC, Howell KM, Caro T (2007) Spatial and temporal patterns of abundance and diversity of an East African leaf litter amphibian fauna. *Biotropica* 39(1):105-113.
13. Gardner TA, *et al.* (2007) The value of primary, secondary, and plantation forests for a neotropical herpetofauna. *Conserv. Biol.* 21(3):775-787.
14. Germano JM, Sander JM, Henderson RW, Powell R (2003) Herpetofaunal communities in Grenada: a comparison of altered sites, with an annotated checklist of Grenadian amphibians and reptiles. *Caribb. J. Sci.* 39(1):68-76.
15. Gray MJ, Smith LM, Brenes R (2004) Effects of agricultural cultivation on demographics of Southern High Plains amphibians. *Conserv. Biol.* 18(5):1368-1377.
16. Gutiérrez-Lamus D, Serrano V, Ramírez-Pinilla M (2004) Composición y abundancia de anuros de dos tipos de bosque (Natural y cultivada) en la cordillera de oriental Colombiana. *Caldasia* 26(1):245-264.

17. Gutierrez-Zuñiga RA (2011) Impacto de los sistemas agroforestales con cacao (*Theobroma cacao*) en la conservación de herpetofauna de hojarasca, en un paisaje fragmentado del trópico húmedo de Panamá. *Magister Scientiae* (CATIE, Costa Rica).
18. Hernández-Ordóñez O, Urbina-Cardona N, Martínez-Ramos M (2015) Recovery of Amphibian and Reptile Assemblages During Old-Field Succession of Tropical Rain Forests. *Biotropica* 47(3):377-388.
19. Herrera-Montes A, Brokaw N (2010) Conservation value of tropical secondary forest: A herpetofaunal perspective. *Biol. Conserv.* 143(6):1414-1422.
20. Hinde R, Corti G, Fanning E, Jenkins RKB (2001) Anurans in the Kilombero Valley, Tanzania: Comparison between miombo woodland, evergreen forest and teak plantations. *African Journal of Herpetology* 50(1):35-39.
21. Isaacs-Cubides PJ, Urbina-Cardona JN (2011) Anthropogenic Disturbance and Edge Effects on Anuran Assemblages Inhabiting Cloud Forest Fragments in Colombia. *Natureza & Conservação* 9(1):39-46.
22. Jongsma GFM, Hedley RW, Durães R, Karubian J (2014) Amphibian Diversity and Species Composition in Relation to Habitat Type and Alteration in the Mache-Chindul Reserve, Northwest Ecuador. *Herpetologica* 70(1):34-46.
23. Karraker NE, Welsh HH (2006) Long-term impacts of even-aged timber management on abundance and body condition of terrestrial amphibians in Northwestern California. *Biol. Conserv.* 131(1):132-140.
24. Katwate U, Apte D, Raut R (2013) Diversity and distribution of anurans in Phansad Wildlife Sanctuary (PWS), northern Western Ghats of India. *Journal of Threatened Taxa* 5(2):3589-3602.
25. Konopik O, Steffan-Dewenter I, Grafe TU (2015) Effects of Logging and Oil Palm Expansion on Stream Frog Communities on Borneo, Southeast Asia. *Biotropica* 47(5):636-643.
26. Kurz DJ, Nowakowski AJ, Tingley MW, Donnelly MA, Wilcove DS (2014) Forest-land use complementarity modifies community structure of a tropical herpetofauna. *Biol. Conserv.* 170:246-255.
27. Machado IF, Maltchik L (2010) Can management practices in rice fields contribute to amphibian conservation in southern Brazilian wetlands? *Aquat. Conserv.: Mar. Freshwat. Ecosyst.* 20(1):39-46.
28. Mitchell JC, Rinehart SC, Pagels JF, Buhlmann KA, Pague CA (1997) Factors influencing amphibian and small mammal assemblages in central Appalachian forests. *For. Ecol. Manage.* 96(1):65-76.
29. Murrieta-Galindo R, López-Barrera F, González-Romero A, Parra-Olea G (2013) Matrix and habitat quality in a montane cloud-forest landscape: amphibians in coffee plantations in central Veracruz, Mexico. *Wildl. Res.* 40(1):25.
30. Palihawadana A (2011) Impact of organic cultivation and agro ecosystem diversity on natural populations of amphibians and fungi in Sri Lankan agricultural landscapes. *Organic is Life Knowledge for Tomorrow*, eds Neuhoff D, Sohn SM, Ssekyaewa C, Halberg N, Rasmussen IA, Hermansen J, p 247.
31. Parris KM & Lindenmayer DB (2004) Evidence that creation of a *Pinus radiata* plantation in south-eastern Australia has reduced habitat for frogs. *Acta Oecol.* 25(1-2):93-101.

32. Patrick DA, Hunter ML, Calhoun AJK (2006) Effects of experimental forestry treatments on a Maine amphibian community. *For. Ecol. Manage.* 234(1-3):323-332.
33. Perison D, Phelps J, Pavel C, Kellison R (1997) The effects of timber harvest in a South Carolina blackwater bottomland. *For. Ecol. Manage.* 90(2):171-185.
34. Pethiyagoda Jr RS, Manamendra-Arachchi K (2013) Endangered anurans in a novel forest in the highlands of Sri Lanka. *Wildl. Res.* 39(7):641.
35. Pineda E, Halffter G (2004) Species diversity and habitat fragmentation: frogs in a tropical montane landscape in Mexico. *Biol. Conserv.* 117(5):499-508.
36. Pineda E, Moreno C, Escobar F, Halffter G (2005) Frog, bat, and dung beetle diversity in the cloud forest and coffee agroecosystems of Veracruz, Mexico. *Conserv. Biol.* 19(2):400-410.
37. Popescu VD, Patrick DA, Hunter ML, Calhoun AJK (2012) The role of forest harvesting and subsequent vegetative regrowth in determining patterns of amphibian habitat use. *For. Ecol. Manage.* 270:163-174.
38. Quiroga GS (2009) Contribución al conocimiento del paisaje de cacaotales, como hábitat para el mantenimiento de la diversidad de herpetofauna en Talamanca, Costa Rica. Magister Scientiae (CATIE, Costa Rica).
39. Rathod S, Rathod P (2013) Amphibian communities in three different coffee plantation regimes in the Western Ghats, India. *Journal of Threatened Taxa* 5(9):4404-4413.
40. Rodriguez-Mendoza C, Pineda E (2010) Importance of riparian remnants for frog species diversity in a highly fragmented rainforest. *Biology Letters* 6(6):781-784.
41. Santos-Barrera G, Urbina-Cardona JN (2011) The role of the matrix-edge dynamics of amphibian conservation in tropical montane fragmented landscapes. *Revista Mexicana de Biodiversidad* 82(2):679-687.
42. Suazo-Ortuño I, et al. (2015) High resilience of herpetofaunal communities in a human-modified tropical dry forest landscape in western Mexico. *Tropical Conservation Science* 8(2):396-423.
43. Sung Y-H, Karraker NE, Hau BCH (2012) Terrestrial herpetofaunal assemblages in secondary forests and exotic *Lophostemon confertus* plantations in South China. *For. Ecol. Manage.* 270:71-77.
44. Toral E, Feinsinger P, Crump ML (2002) Frogs and a Cloud-Forest Edge in Ecuador. *Conserv. Biol.* 16(3):735-744.
45. Trimble MJ, van Aarde RJ (2014) Amphibian and reptile communities and functional groups over a land-use gradient in a coastal tropical forest landscape of high richness and endemism. *Anim. Conserv.* 17(5):441-453.
46. Urbina-Cardona JN, Olivares-Pérez M, Reynoso VH (2006) Herpetofauna diversity and microenvironment correlates across a pasture-edge-interior ecotone in tropical rainforest fragments in the Los Tuxtlas Biosphere Reserve of Veracruz, Mexico. *Biol. Conserv.* 132(1):61-75.
47. Vonesh JR (2001) Patterns of Richness and Abundance in a Tropical African Leaf-litter Herpetofauna. *Biotropica* 33(3):502-510.
48. Waldick R, Freedman B, Wassersug R (1999) The consequences for amphibians of the conversion of natural, mixed-species forests to conifer plantations in southern New Brunswick. *Can. Field-Nat.* 113(3):408-418.
